# Supplementary material for: In-patient evolution of a high-persister Escherichia coli strain with reduced in vivo antibiotic susceptibility
Source: PubMed Central journal article supplement — Proc Natl Acad Sci U S A. 2024 Jan 8;121(3):e2314514121. doi: 10.1073/pnas.2314514121 (PMC10801923; doi:10.1073/pnas.2314514121), 2024-01-08
Supplement: pnas.2314514121.sapp.pdf [file pnas.2314514121.sapp.pdf]

1 **Supplementary Information**

2  
3 **In-patient evolution of a high-persister *Escherichia coli* strain with reduced in-vivo**  
4 **antibiotic susceptibility**

5 Joshua B. Parsons<sup>1,2\*</sup>, Ashelyn E. Sidders<sup>2</sup>, Amanda Z. Velez<sup>2</sup>, Blake M. Hanson<sup>3</sup>, Michelle  
6 Angeles-Solano<sup>2</sup>, Felicia Ruffin<sup>1</sup>, Sarah E. Rowe<sup>2</sup>, Cesar A. Arias<sup>4,5</sup>, Vance G. Fowler Jr<sup>1</sup>, Joshua  
7 T. Thaden<sup>1</sup>, Brian P. Conlon<sup>2\*</sup>

8 \* Co-corresponding author

9 Corresponding Authors: Joshua B. Parsons and Brian P. Conlon

10 **Email:** joshua.parsons@duke.edu (JBP), brian\_conlon@med.unc.edu (BPC)

11  
12 This PDF file includes:

- 13 • Figures S1-S4
- 14 • Tables S1-S7
- 15 • SI References

16

17

18

19  
20  
21  
22  
23  
24  
25  
26  
27  
28  
29  
30  
31  
32  
33  
34  
35  
36  
37  
38  
39  
40  
41  
42  
43  
44  
45  
46  
47  
48  
49  
50

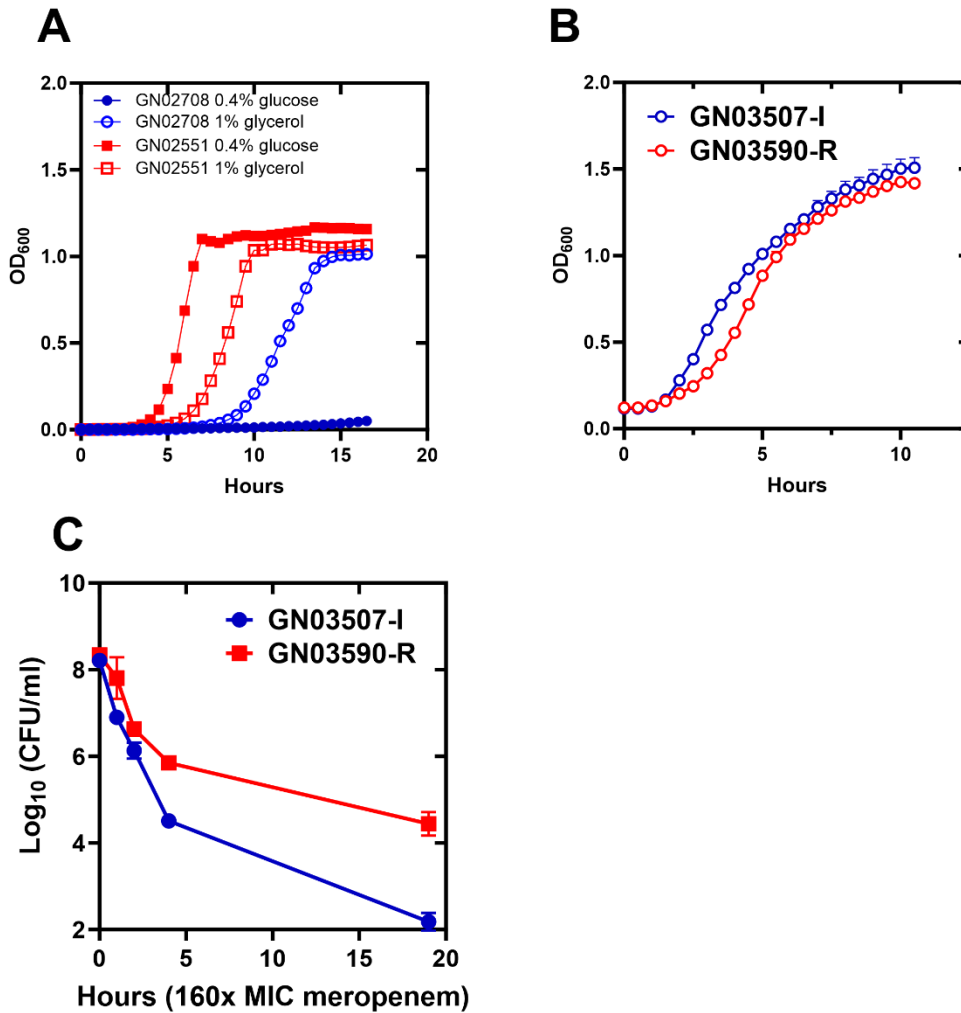

**Supplementary Figure S1: A. *K. pneumoniae* *pfkA* mutant can no longer utilize glucose as sole carbon source.** Growth of *Klebsiella pneumoniae* initial (GN02551) and relapsed (GN02708) isolate with *pfkA* frameshift. **B. Growth of GN03507 and GN03590 in Luria-Broth media.** **C. High persister phenotype of GN03590-R is not due to prolonged lag phase.** We sought to minimize residual stationary phase cells by performing the persister assay using a log-phase inoculum. Overnight cultures of GN03507-I and GN03590-R were diluted 1:1000 into fresh LB and grown to OD<sub>600</sub> = 1.0. These cultures were further backdiluted 1:100 to OD<sub>600</sub> = 0.01 to minimize residual stationary phase cells from the initial inoculum. Cultures then grown from OD<sub>600</sub> = 0.01 to OD<sub>600</sub> = 0.4 before addition of 160x MIC meropenem. Data are summary of six biological replicates. Error bars represent standard deviation.

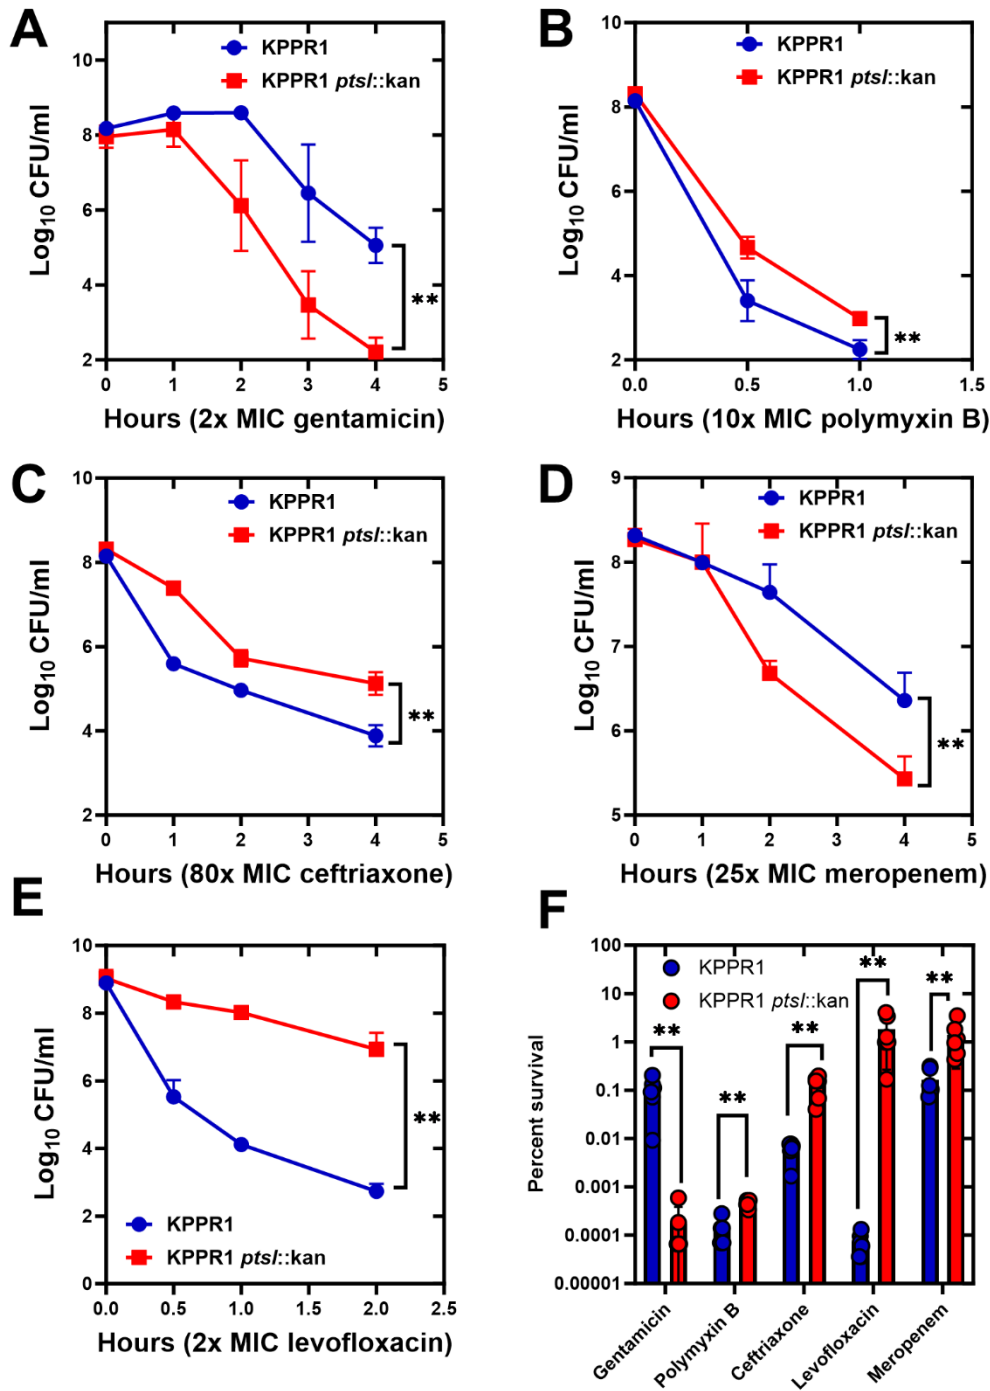53 **Supplementary Figure S2: PtsI deficiency in *Klebsiella pneumoniae* KPPR1 confers multidrug tolerance.**

54 Panels A-E: Time-kill curves measuring persister formation with different antibiotics. Panel F. Summary

55 of panels A-E. Gentamicin used at 2x MIC for 4 hours, Polymyxin B 10x MIC for 1 hour, ceftriaxone 80x

56 MIC for 4 hours, levofloxacin 2x MIC for 2 hours, meropenem 25x MIC for 4 hours. Statistical significance  
57 was determined by Mann-Whitney test. Results considered significant if  $p < 0.05$ .

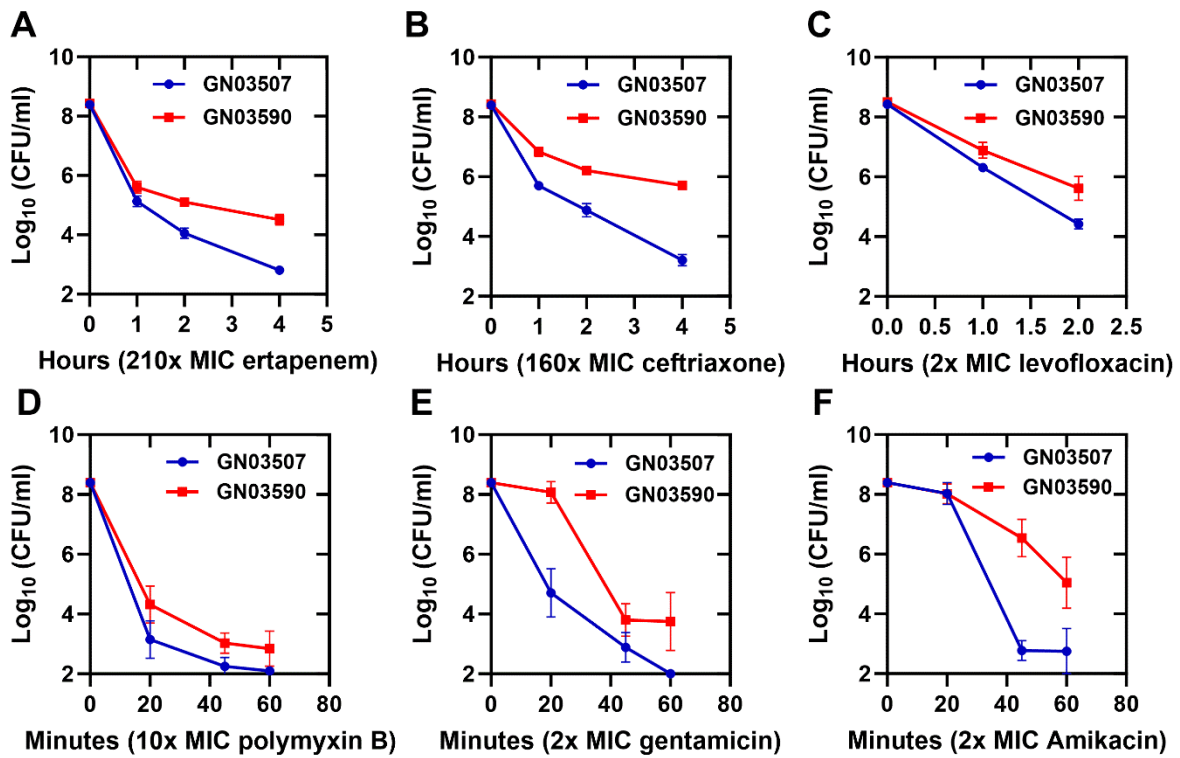

58

59 **Supplementary Figure S3: Time-kill curves of GN03507 and GN03590 exposed to different antibiotics.**  
60 X-axis represents the time exposed to each antibiotic.

61

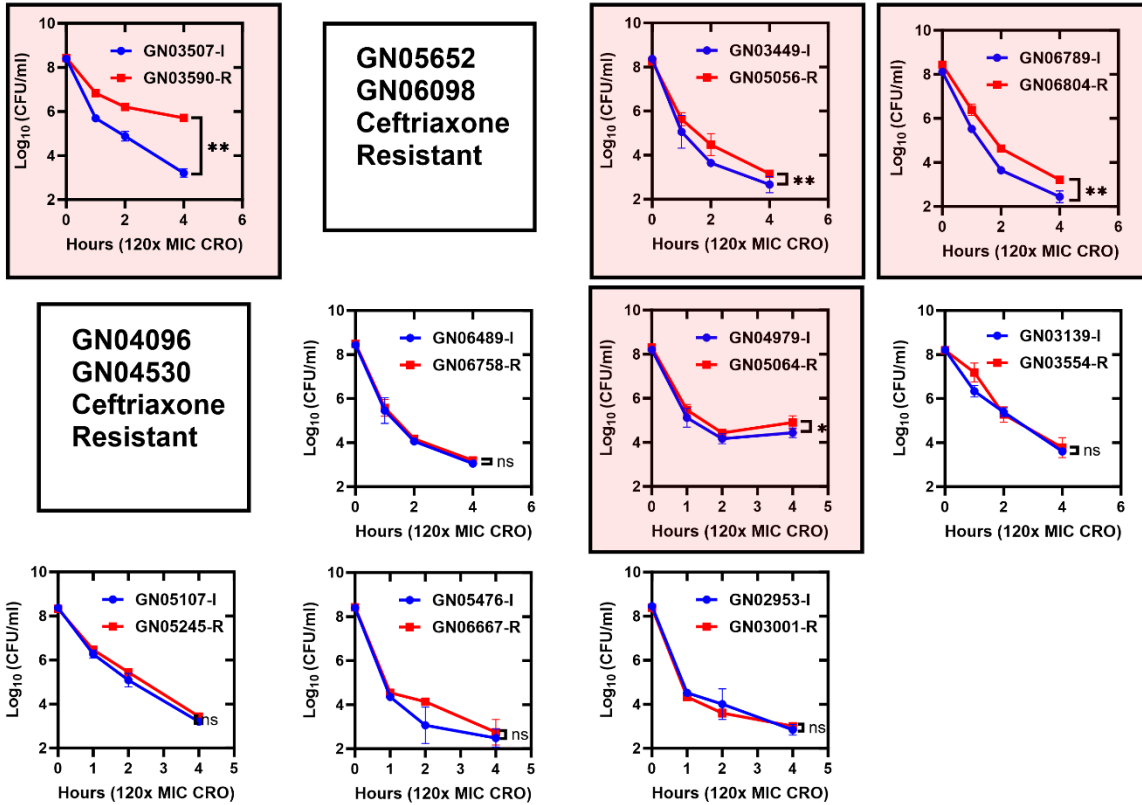

62

63 **Supplementary Figure S4: Ceftriaxone persister screen of initial and relapsed *E. coli* isolates.** Screen  
 64 performed with 120-200x MIC ceftriaxone (CRO) added to mid-exponential *E. coli* grown in LB broth. At  
 65 specified time point, aliquot removed, washed and enumerated. Isolate pairs highlighted in red show  
 66 increased persisters, isolate pair in green with reduced persisters. Two isolate pairs (GN04096-GN04530  
 67 and GN05652-GN06098) with one of both isolates resistant to ceftriaxone were excluded. Data are  
 68 summary of six biological replicates. Error bars represent standard deviation. Significance determined by  
 69 Mann-Whitney test of the 4 hour or 22 hour time point (significance level:  $p < 0.05$ ).

70

71

72

73

74

75

76

77

78

79 Table S1: Non-synonymous SNPs arising between initial and relapsed *E. coli* isolates

| Initial Isolate | Recurrent Isolate | Species        | Mutation type         | Gene        | Product                                                                       | Amino acid Substitution | Function                     |
|-----------------|-------------------|----------------|-----------------------|-------------|-------------------------------------------------------------------------------|-------------------------|------------------------------|
| GN06789         | GN06804           | <i>E. coli</i> | Missense              | <i>pfkB</i> | ATP-dependent 6-phosphofructokinase isozyme 2                                 | M225L                   | CHO metabolism               |
|                 |                   |                | Missense              | <i>ompR</i> | Transcriptional regulatory protein OmpR                                       | K88Q                    | Drug resistance              |
|                 |                   |                | Frameshift            | <i>pal</i>  | Peptidoglycan-associated lipoprotein                                          | L9fs                    | Virulence                    |
| GN05652         | GN06098           | <i>E. coli</i> | Missense              | <i>gpml</i> | 2,3-bisphosphoglycerate-independent phosphoglycerate mutase                   | G410V                   | CHO metabolism               |
|                 |                   |                | Missense              | <i>mtl</i>  | PTS system mannitol-specific EIICB component                                  | A122V                   | CHO metabolism               |
|                 |                   |                | Frameshift            | <i>mnmC</i> | tRNA 5-methylaminomethyl-2-thiouridine biosynthesis bifunctional protein MnmC | S30fs                   | Amino acid/Protein synthesis |
|                 |                   |                | Missense              | <i>yedI</i> | Inner membrane protein YedI                                                   | A122V                   | Unknown                      |
|                 |                   |                | Missense              | <i>rimI</i> | [Ribosomal protein S18]-alanine N-acetyltransferase                           | Stop130Y                | Amino acid/Protein synthesis |
|                 |                   |                | Missense              | <i>oxyR</i> | Hydrogen peroxide-inducible genes activator                                   | A100T                   | Stress response              |
|                 |                   |                | Conservative deletion | <i>traD</i> | Coupling protein TraD                                                         | Q638-P640               | Conjugation                  |
| GN03507         | GN03590           | <i>E. coli</i> | Missense              | <i>argD</i> | Acetylmithine/succinylidiaminopimelate aminotransferase                       | P85L                    | Amino acid/Protein synthesis |
|                 |                   |                | Missense              | <i>ptsI</i> | Phosphoenolpyruvate-protein phosphotransferase                                | V488F                   | CHO metabolism               |
| GN04096         | GN04530           | <i>E. coli</i> | Disruptive insertion  | <i>gatC</i> | PTS system galactitol-specific EIIC component                                 | P85L                    | CHO metabolism               |
|                 |                   |                | Missense              | <i>lapB</i> | Lipopolysaccharide assembly protein B                                         | R375W                   | Cell wall synthesis          |
|                 |                   |                | Frameshift            | <i>nfsA</i> | Oxygen-insensitive NADPH nitroreductase                                       | G158fs                  | Drug resistance              |
|                 |                   |                | Missense              | <i>rob</i>  | Right origin-binding protein                                                  | K108E                   | Drug resistance              |
|                 |                   |                | Missense              | <i>rob</i>  | Right origin-binding protein                                                  | G245R                   | Drug resistance              |
|                 |                   |                | Missense              | <i>purD</i> | Phosphoribosylamine--glycine ligase                                           | G368S                   | DNA synthesis                |
|                 |                   |                | Frameshift            | <i>repB</i> | RepFIB replication protein A                                                  | Q89fs                   | Plasmid replication          |
| GN03139         | GN03531           | <i>E. coli</i> | Missense              | <i>lapB</i> | Lipopolysaccharide assembly protein B                                         | H72Y                    | Stress response              |
|                 |                   |                | Missense              | <i>intA</i> | Prophage integrase IntA                                                       | V181L                   | Unknown                      |
|                 |                   |                | Missense              | <i>cynS</i> | Cyanate hydratase                                                             | N66D                    | Unknown                      |
|                 |                   |                | Missense              | <i>blc</i>  | Outer membrane lipoprotein Blc                                                | F53V                    | Lipoprotein                  |
|                 |                   |                | Missense              | <i>uvrA</i> | UvrABC system protein A                                                       | L168Q                   | Stress response              |
|                 |                   |                | Disruptive deletion   | <i>rpIW</i> | 50S ribosomal protein L23                                                     | D56del                  | Protein Synthesis            |
|                 |                   |                | Missense              | <i>ygaV</i> | putative HTH-type transcriptional regulator YgaV                              | D73G                    | Unknown                      |

|         |         |                |                                             |             |                                                  |             |                   |
|---------|---------|----------------|---------------------------------------------|-------------|--------------------------------------------------|-------------|-------------------|
|         |         |                | Missense                                    | <i>fliT</i> | Flagellar protein FliT                           | V93I        | Flagella          |
| GN04979 | GN05064 | <i>E. coli</i> | Missense                                    | <i>nuoF</i> | NADH-quinone oxidoreductase subunit F            | Stop106E    | CHO metabolism    |
|         |         |                | Frameshift                                  | <i>yurK</i> | putative HTH-type transcriptional regulator YurK | Ser200fs    | Unknown           |
| GN03449 | GN05056 | <i>E. coli</i> | Disruptive Deletion                         | <i>rplW</i> | 50S ribosomal protein L23                        | E56-V57 del | Protein Synthesis |
|         |         |                | Missense                                    | <i>ygaV</i> | putative HTH-type transcriptional regulator YgaV | D73G        | Unknown           |
|         |         |                | Missense                                    | <i>fliT</i> | Flagellar protein                                | V93I        | Flagella          |
| GN02953 | GN03001 | <i>E. coli</i> | No mutations in coding sequences            |             |                                                  |             |                   |
| GN06489 | GN06758 | <i>E. coli</i> | No mutations in coding sequences            |             |                                                  |             |                   |
| GN05476 | GN06667 | <i>E. coli</i> | No mutations in coding sequences            |             |                                                  |             |                   |
| GN05107 | GN05245 | <i>E. coli</i> | Sequencing incomplete – unable to call SNPs |             |                                                  |             |                   |

80

81

82

83

84

85

86

87

88

89

90

91

92

93

94

95

96

97

98

99 Table S2: Non-synonymous SNPs arising between initial and relapsed *Klebsiella species* isolates

| Initial Isolate | Recurrent Isolate | Species                | Mutation type       | Gene        | Product                                                    | Amino acid Substitution | Function           |
|-----------------|-------------------|------------------------|---------------------|-------------|------------------------------------------------------------|-------------------------|--------------------|
| GN05714         | GN06034           | <i>Klebsiella spp.</i> | Missense            | <i>ompC</i> | Outer membrane porin C                                     | Q313K                   | Drug resistance    |
|                 |                   |                        | Missense            | <i>fyuA</i> | Pesticin receptor                                          | G514R                   | Unknown            |
|                 |                   |                        | Missense            | <i>sufB</i> | FeS cluster assembly protein SufB                          | V132L                   | Stress response    |
|                 |                   |                        | Missense            | <i>ydjE</i> | Inner membrane metabolite transport protein YdjE           | G78V                    | Transport          |
|                 |                   |                        | Missense            | <i>lon</i>  | Lon protease                                               | A672V                   | CHO metabolism     |
| GN03826         | GN04029           | <i>Klebsiella spp.</i> | Missense            | <i>dgcP</i> | Diguanylate cyclase                                        | P12T                    | Stress response    |
| GN02551         | GN02708           | <i>Klebsiella spp.</i> | Disruptive deletion | <i>lldR</i> | Putative L-lactate dehydrogenase operon regulatory protein | H75P, E78-81del         | Unknown            |
|                 |                   |                        | Frameshift          | <i>lepA</i> | Elongation factor 4                                        | R90fs                   | Protein synthesis  |
|                 |                   |                        | Missense            | <i>gyrA</i> | DNA gyrase subunit A                                       | S83Y                    | Drug resistance    |
|                 |                   |                        | Missense            | <i>sufB</i> | FeS cluster assembly protein SufB                          | Q491stop                | Stress response    |
|                 |                   |                        | Frameshift          | <i>pfkA</i> | ATP-dependent 6-phosphofructokinase isozyme 1              | R262fs                  | Glucose metabolism |

100

101

102

103

104

105

106

107

108

109

110

111



112 Table S3: Non-synonymous SNPs arising between initial and relapsed *Serratia marcescens* isolates

| Initial Isolate | Recurrent Isolate | Species                   | Mutation type       | Gene        | Product                                                                    | Amino acid substitution | Function            |
|-----------------|-------------------|---------------------------|---------------------|-------------|----------------------------------------------------------------------------|-------------------------|---------------------|
| GN02777         | GN02991           | <i>S. marcescens</i>      | Missense            | <i>livF</i> | High-affinity branched-chain amino acid transport ATP-binding protein LivF | A193V                   | Transport           |
|                 |                   |                           | Missense            | <i>crr</i>  | PTS system glucose-specific EIIA component                                 | I71T                    | CHO metabolism      |
| GN02673         | GN03438           | <i>S. marcescens</i>      | Frameshift          | <i>wecA</i> | Undecaprenyl-phosphate alpha-N-acetylglucosaminyl 1-phosphate transferase  | Ile144fs                | Cell wall synthesis |
| GN02673         | GN03465           | <i>S. marcescens</i>      | Missense            | <i>rpoB</i> | DNA-directed RNA polymerase subunit beta                                   | P497S                   | RNA synthesis       |
|                 |                   |                           | Frameshift          | <i>tetC</i> | Transposon Tn10 TetC protein                                               | Leu137fs                | Drug resistance     |
|                 |                   |                           | Missense            | <i>arcA</i> | Aerobic respiration control protein                                        | H171Y                   | Virulence           |
|                 |                   |                           | Missense            | <i>ftsW</i> | putative peptidoglycan glycosyltransferase FtsW                            | R34C                    | Cell division       |
|                 |                   |                           | Frameshift          | <i>pcm</i>  | Protein-L-isoaspartate O-methyltransferase                                 | Y62fs                   | Stress response     |
|                 |                   |                           | Frameshift          | <i>lon</i>  | Lon protease                                                               | L506fs                  | Stress response     |
|                 |                   |                           | Frameshift          | <i>dacA</i> | D-alanyl-D-alanine carboxypeptidase DacA                                   | K395fs                  | Cell wall synthesis |
|                 |                   |                           | Disruptive deletion | <i>clpA</i> | ATP-dependent Clp protease ATP-binding subunit ClpA                        | R431del                 | Stress response     |
|                 |                   |                           | Disruptive deletion | <i>rpsA</i> | 30S ribosomal protein S1                                                   | V75del                  | Protein synthesis   |
|                 |                   |                           | Frameshift          | <i>sufD</i> | FeS cluster assembly protein SufD                                          | W35fs                   | Stress response     |
|                 |                   |                           | Missense            | <i>ampR</i> | HTH-type transcriptional activator AmpR                                    | G89R                    | Drug resistance     |
|                 |                   |                           | Deletion            | <i>topA</i> | DNA topoisomerase 1                                                        | Leu761del               | DNA synthesis       |
|                 |                   |                           | Frameshift          | <i>ompC</i> | Outer membrane porin C                                                     | S147fs                  | Drug resistance     |
|                 |                   |                           | Missense            | <i>gyrA</i> | DNA gyrase subunit A                                                       | D82N                    | DNA synthesis       |
|                 |                   |                           | GN02903             | GN02955     | <i>S. marcescens</i>                                                       | Frameshift              | <i>nuoC</i>         |
| Deletion        | <i>rpsL</i>       | 30S ribosomal protein S12 |                     |             |                                                                            | L24del                  | Protein synthesis   |
| Frameshift      | <i>nuoF</i>       |                           |                     |             |                                                                            | Y156fs                  | Electron transport  |

113

114

115

116

117

118 Table S4: Non-synonymous SNPs arising between initial and relapsed *Pseudomonas aeruginosa* isolates

119

| Initial Isolate | Recurrent Isolate | Species              | Mutation type | Gene        | Product                                                                    | Amino acid substitution | Function              |
|-----------------|-------------------|----------------------|---------------|-------------|----------------------------------------------------------------------------|-------------------------|-----------------------|
| GN06288         | GN06816           | <i>P. aeruginosa</i> | Insertion     | <i>tdh</i>  | L-threonine 3-dehydrogenase                                                | Cys245dup               | Amino acid catabolism |
| GN06251         | GN06858           | <i>P. aeruginosa</i> | Missense      | <i>gyrA</i> | DNA gyrase subunit A                                                       | T83I                    | DNA synthesis         |
|                 |                   |                      | Frameshift    | <i>oprD</i> | Porin D                                                                    | D178fs                  | Drug resistance       |
|                 |                   |                      | Frameshift    | <i>oprD</i> | Porin D                                                                    | N199fs                  | Drug resistance       |
|                 |                   |                      | Frameshift    | <i>mscS</i> | Small-conductance mechanosensitive channel                                 | V47I                    | Stress Response       |
|                 |                   |                      | Frameshift    | <i>ampD</i> | 1,6-anhydro-N-acetylmuramyl-L-alanine amidase AmpD                         | K165E                   | Drug resistance       |
| GN04821         | GN04922           | <i>P. aeruginosa</i> | Frameshift    | <i>livF</i> | High-affinity branched-chain amino acid transport ATP-binding protein LivF | M48I                    | Transport             |
|                 |                   |                      | Missense      | <i>mltB</i> | Membrane-bound lytic murein transglycosylase B                             | W7stop                  | Cell Wall Synthesis   |

120

121

122

123

124

125

126

127

128

129

130

131

132 Table S5: Bacterial Strains and Minimum Inhibitory Concentrations of Different Isolates to antibiotics  
 133 used in this study

| Species              | Isolate                  | Source | Initial or Relapse | MIC (µg/ml) |       |       |     |       |     |    |
|----------------------|--------------------------|--------|--------------------|-------------|-------|-------|-----|-------|-----|----|
|                      |                          |        |                    | MEM         | EPM   | CRO   | PMB | LEV   | AMK | GM |
| <i>E. coli</i>       | GN03507                  | (1)    | Initial            | 0.03        | 0.016 | 0.125 | 0.5 | 0.1   | 15  | 15 |
| <i>E. coli</i>       | GN03590                  | (1)    | Relapse            | 0.03        | 0.016 | 0.125 | 0.5 | 0.1   | 15  | 15 |
| <i>E. coli</i>       | GN02953                  | (1)    | Initial            | 0.05        | NT    | 3.125 | NT  | 25    | NT  | NT |
| <i>E. coli</i>       | GN03001                  | (1)    | Relapse            | 0.05        | NT    | 3.125 | NT  | 25    | NT  | NT |
| <i>E. coli</i>       | GN03139                  | (1)    | Initial            | 0.06        | NT    | 0.32  | NT  | 50    | NT  | NT |
| <i>E. coli</i>       | GN03551                  | (1)    | Relapse            | 0.06        | NT    | 0.32  | NT  | 50    | NT  | NT |
| <i>E. coli</i>       | GN03449                  | (1)    | Initial            | 0.125       | NT    | 0.078 | NT  | 6.25  | NT  | NT |
| <i>E. coli</i>       | GN05056                  | (1)    | Relapse            | 0.125       | NT    | 3.125 | NT  | 25    | NT  | NT |
| <i>E. coli</i>       | GN04096                  | (1)    | Initial            | 0.06        | NT    | >200  | NT  | 50    | NT  | NT |
| <i>E. coli</i>       | GN04530                  | (1)    | Relapse            | 0.06        | NT    | >200  | NT  | 50    | NT  | NT |
| <i>E. coli</i>       | GN04979                  | (1)    | Initial            | 0.06        | NT    | 0.078 | NT  | 0.03  | NT  | NT |
| <i>E. coli</i>       | GN05064                  | (1)    | Relapse            | 0.06        | NT    | 0.039 | NT  | 0.03  | NT  | NT |
| <i>E. coli</i>       | GN05476                  | (1)    | Initial            | 0.012       | NT    | 0.048 | NT  | 0.05  | NT  | NT |
| <i>E. coli</i>       | GN06667                  | (1)    | Relapse            | 0.012       | NT    | 0.048 | NT  | 0.05  | NT  | NT |
| <i>E. coli</i>       | GN05652                  | (1)    | Initial            | 0.03        | NT    | 0.156 | NT  | 6.25  | NT  | NT |
| <i>E. coli</i>       | GN06098                  | (1)    | Relapse            | 0.03        | NT    | >200  | NT  | 12.5  | NT  | NT |
| <i>E. coli</i>       | GN05107                  | (1)    | Initial            | 0.02        | NT    | 0.156 | NT  | 12.5  | NT  | NT |
| <i>E. coli</i>       | GN05245                  | (1)    | Relapse            | 0.02        | NT    | 0.156 | NT  | 25    | NT  | NT |
| <i>E. coli</i>       | GN06489                  | (1)    | Initial            | 0.05        | NT    | 0.125 | NT  | 0.063 | NT  | NT |
| <i>E. coli</i>       | GN06758                  | (1)    | Relapse            | 0.025       | NT    | 0.125 | NT  | 0.063 | NT  | NT |
| <i>E. coli</i>       | GN06789                  | (1)    | Initial            | 0.06        | NT    | 0.156 | NT  | 12.5  | NT  | NT |
| <i>E. coli</i>       | GN06804                  | (1)    | Relapse            | 0.06        | NT    | 0.078 | NT  | 25    | NT  | NT |
| <i>K. pneumoniae</i> | KPPR1                    | (2)    | N/A                | 0.125       | NT    | 0.06  | NT  | 0.13  | NT  | 2  |
| <i>K. pneumoniae</i> | KPPR1<br><i>pts::kan</i> | (2)    | N/A                | 0.25        | NT    | 0.06  | NT  | 0.13  | NT  | 2  |

134 NT; Not tested, MEM; meropenem, EPM; ertapenem, CRO; ceftriaxone, PMB; polymyxin B, LEV;  
 135 levofloxacin, AMK; amikacin, GM; gentamicin

136

137

138

139

140

141 Table S6: Clinical microbiology susceptibilities (based on Clinical and Laboratory Standards Institute  
 142 criteria) of initial and relapsed *E. coli* isolates to different antibiotics(3). Red indicates resistance, yellow  
 143 indicates intermediate resistance and green represents susceptible. Persister column refers to change in  
 144 persister abundance between initial and relapse isolates, described in Figure 2.

| Isolate | Species        | Persisters | AMP   | PT     | SAM    | CZ     | CRO   | CPIM  | MEM   | GM    | TOB    | AMK   | SMX   | LEV   |
|---------|----------------|------------|-------|--------|--------|--------|-------|-------|-------|-------|--------|-------|-------|-------|
| GN03507 | <i>E. coli</i> | ↑          | Red   | Green  | Red    | Green  | Green | Green | Green | Green | Green  | Green | Green | Green |
| GN03590 | <i>E. coli</i> |            | Red   | Green  | Red    | Green  | Green | Green | Green | Green | Green  | Green | Green | Green |
| GN02953 | <i>E. coli</i> | No Change  | Red   | Green  | Red    | Red    | Green | Green | Green | Red   | Red    | Green | Red   | Red   |
| GN03001 | <i>E. coli</i> |            | Red   | Green  | Red    | Red    | Green | Green | Green | Red   | Yellow | Green | Red   | Red   |
| GN03139 | <i>E. coli</i> | No Change  | Red   | Green  | Yellow | Green  | Green | Green | Green | Red   | Red    | Green | Red   | Red   |
| GN03551 | <i>E. coli</i> |            | Red   | Yellow | Red    | Red    | Green | Green | Green | Red   | Yellow | Green | Red   | Red   |
| GN03449 | <i>E. coli</i> | ↑          | Red   | Green  | Yellow | Green  | Green | Green | Green | Red   | Yellow | Green | Green | Red   |
| GN05056 | <i>E. coli</i> |            | Green | Green  | Green  | Green  | Green | Green | Green | Green | Green  | Green | Red   | Red   |
| GN04096 | <i>E. coli</i> | ↓          | Red   | Red    | Red    | Red    | Red   | Red   | Green | Red   | Yellow | Green | Red   | Red   |
| GN04530 | <i>E. coli</i> |            | Red   | Red    | Red    | Red    | Red   | Red   | Green | Green | Green  | Green | Red   | Red   |
| GN04979 | <i>E. coli</i> | No Change  | Green | Green  | Green  | Green  | Green | Green | Green | Green | Green  | Green | Green | Green |
| GN05064 | <i>E. coli</i> |            | Green | Green  | Green  | Green  | Green | Green | Green | Green | Green  | Green | Green | Green |
| GN05476 | <i>E. coli</i> | No Change  | Green | Green  | Green  | Green  | Green | Green | Green | Green | Green  | Green | Green | Green |
| GN06667 | <i>E. coli</i> |            | Green | Green  | Green  | Green  | Green | Green | Green | Green | Green  | Green | Green | Green |
| GN05652 | <i>E. coli</i> | ↑          | Red   | Green  | Yellow | Green  | Green | Green | Green | Red   | Red    | Green | Green | Red   |
| GN06098 | <i>E. coli</i> |            | Red   | Red    | Red    | Red    | Red   | Red   | Green | Green | Red    | Red   | Green | Red   |
| GN05107 | <i>E. coli</i> | No Change  | Red   | Green  | Red    | Red    | Green | Green | Green | Red   | Green  | Green | Red   | Red   |
| GN05245 | <i>E. coli</i> |            | Red   | Green  | Red    | Yellow | Green | Green | Green | Red   | Red    | Green | Red   | Red   |
| GN06489 | <i>E. coli</i> | No Change  | Red   | Green  | Red    | Green  | Green | Green | Green | Green | Green  | Green | Green | Green |
| GN06758 | <i>E. coli</i> |            | Red   | Green  | Yellow | Yellow | Green | Green | Green | Green | Green  | Green | Green | Green |
| GN06789 | <i>E. coli</i> | ↑          | Red   | Green  | Red    | Green  | Green | Green | Green | Green | Green  | Green | Red   | Red   |
| GN06804 | <i>E. coli</i> |            | Red   | Green  | Red    | Yellow | Green | Green | Green | Green | Green  | Green | Red   | Red   |

145 AMP; Ampicillin, PT; piperacillin-tazobactam, SAM; ampicillin-sulbactam, CZ; cefazolin, CRO; ceftriaxone,  
 146 CPIM; cefepime, MEM; meropenem, GM; gentamicin, TOB; tobramycin, AMK; amikacin, SMX;  
 147 trimethoprim-sulfamethoxazole, LEV; levofloxacin

148  
 149  
 150  
 151  
 152  
 153

- 1 Table S7: Treatment regimens for each episode of *E. coli* bacteremia. Green indicates isolate is susceptible to antibiotic used, yellow indicates
- 2 intermediate resistance.

| Isolate | Species        | Initial or Relapse | Days since initial BSI | Source of bacteremia | First Antibiotic              | Duration first antibiotic (days) | Second antibiotic       | Duration second antibiotic (days) | Third antibiotic | Duration third antibiotic (days) | Total days effective therapy |
|---------|----------------|--------------------|------------------------|----------------------|-------------------------------|----------------------------------|-------------------------|-----------------------------------|------------------|----------------------------------|------------------------------|
| GN03507 | <i>E. coli</i> | Initial            | -                      | Urine                | Piperacillin-tazobactam       | 2                                | Ceftriaxone             | 14                                |                  |                                  | 16                           |
| GN03590 | <i>E. coli</i> | Relapse            | 39                     | Skin/Soft tissue     | Trimethoprim-sulfamethoxazole | 1                                | Ertapenem               | 28                                |                  |                                  | 29                           |
| GN02953 | <i>E. coli</i> | Initial            | -                      | Urine                | Piperacillin-tazobactam       | 6                                | Cefdinir                | 8                                 |                  |                                  | 14                           |
| GN03001 | <i>E. coli</i> | Relapse            | 21                     | Urine                | Piperacillin-tazobactam       | 5                                | Ceftriaxone             | 15                                |                  |                                  | 20                           |
| GN03139 | <i>E. coli</i> | Initial            | -                      | Urine                | Ceftazidime                   | 3                                | Cephalexin              | 12                                |                  |                                  | 15                           |
| GN03551 | <i>E. coli</i> | Relapse            | 271                    | Urine                | Piperacillin-tazobactam       | 1                                | Ceftriaxone             | 11                                |                  |                                  | 11                           |
| GN03449 | <i>E. coli</i> | Initial            | -                      | Urine                | Piperacillin-tazobactam       | 14                               | Cefazolin               | 1                                 |                  |                                  | 15                           |
| GN05056 | <i>E. coli</i> | Relapse            | 957                    | Urine                | Ceftriaxone                   | 4                                | Cephalexin              | 9                                 |                  |                                  | 13                           |
| GN04096 | <i>E. coli</i> | Initial            | -                      | Unknown              | Meropenem                     | 6                                | Ertapenem               | 10                                |                  |                                  | 16                           |
| GN04530 | <i>E. coli</i> | Relapse            | 219                    | Urine                | Ertapenem                     | 43                               |                         |                                   |                  |                                  | 43                           |
| GN04979 | <i>E. coli</i> | Initial            | -                      | Urine                | Ceftriaxone                   | 7                                | Cephalexin              | 7                                 |                  |                                  | 14                           |
| GN05064 | <i>E. coli</i> | Relapse            | 40                     | Urine                | Ciprofloxacin                 | 4                                | Aztreonam               | 5                                 |                  |                                  | 9                            |
| GN05476 | <i>E. coli</i> | Initial            | -                      | Urine                | Ceftriaxone                   | 1                                | Piperacillin-tazobactam | 2                                 | Ciprofloxacin    | 8                                | 11                           |
| GN06667 | <i>E. coli</i> | Relapse            | 606                    | Urine                | Cefepime                      | 2                                | Ciprofloxacin           | 12                                |                  |                                  | 14                           |
| GN05652 | <i>E. coli</i> | Initial            | -                      | GI                   | Piperacillin-tazobactam       | 5                                |                         | 0                                 |                  |                                  | 5                            |
| GN06098 | <i>E. coli</i> | Relapse            | 263                    | Urine                | Meropenem                     | 6                                | Ertapenem               | 6                                 |                  |                                  | 12                           |
| GN05107 | <i>E. coli</i> | Initial            | -                      | Urine                | Piperacillin-tazobactam       | 1                                | Ceftazidime             | 3                                 | Ceftriaxone      | 10                               | 14                           |
| GN05245 | <i>E. coli</i> | Relapse            | 97                     | Urine                | Piperacillin-tazobactam       | 4                                | Cefuroxime              | 14                                |                  |                                  | 18                           |
| GN06489 | <i>E. coli</i> | Initial            | -                      | Urine                | Piperacillin-tazobactam       | 3                                | Ceftriaxone             | 5                                 | Cephalexin       | 10                               | 18                           |
| GN06758 | <i>E. coli</i> | Relapse            | 114                    | Urine                | Ceftriaxone                   | 2                                | Ciprofloxacin           | 10                                |                  |                                  | 12                           |
| GN06789 | <i>E. coli</i> | Initial            | -                      | Urine                | Piperacillin-tazobactam       | 4                                | Cephalexin              | 4                                 |                  |                                  | 8                            |
| GN06804 | <i>E. coli</i> | Relapse            | 8                      | Urine                | Piperacillin-tazobactam       | 4                                | Ceftriaxone             | 30                                |                  |                                  | 34                           |

## Supplemental References

1. A. Bock *et al.*, Clinical and Molecular Analyses of Recurrent Gram-Negative Bloodstream Infections. *Clin Infect Dis* **76**, e1285-e1293 (2023).
2. L. A. Mike *et al.*, A systematic analysis of hypermucoviscosity and capsule reveals distinct and overlapping genes that impact *Klebsiella pneumoniae* fitness. *PLoS Pathog* **17**, e1009376 (2021).
3. R. M. Humphries, A. N. Abbott, J. A. Hindler, Understanding and Addressing CLSI Breakpoint Revisions: a Primer for Clinical Laboratories. *J Clin Microbiol* **57** (2019).
